# Supplementary material for: Comparison of dot chromosome sequences from D. melanogaster and D. virilis reveals an enrichment of DNA transposon sequences in heterochromatic domains
Source: PubMed Central journal article supplement (PMC1431729; doi:10.1186/gb-2006-7-2-r15), 2006-02-20

Dvir13

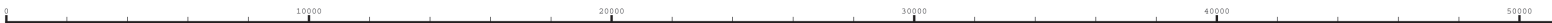

Annotation

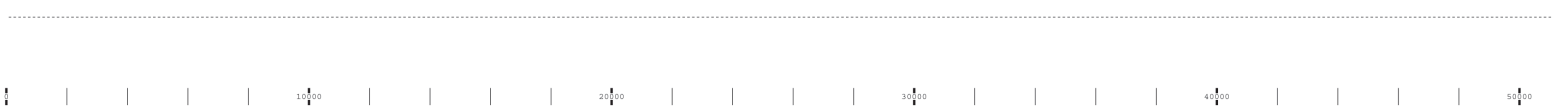

RpMasker

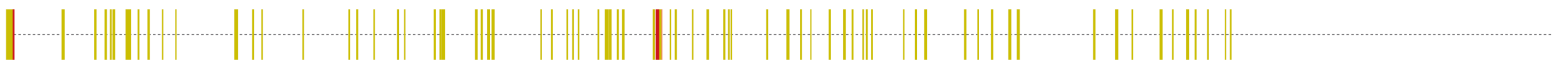

Contig

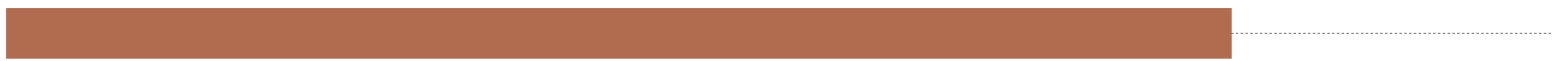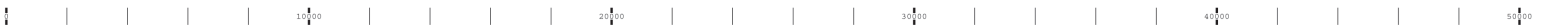

Annotation

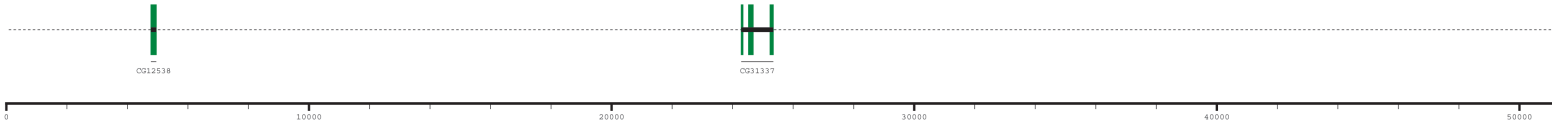

- DNA Transposon
- DINEs
- Other Repeats
- UTR
- Exons

Dmel13

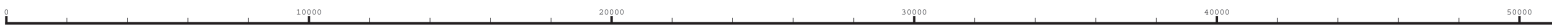

Annotation

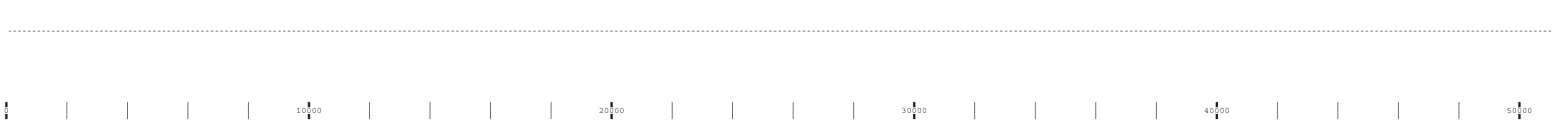

RpMasker

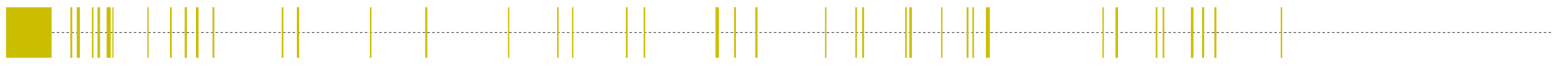

Contig

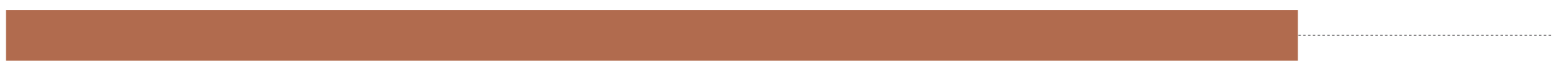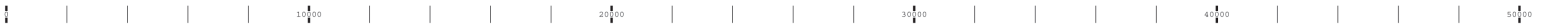

Annotation

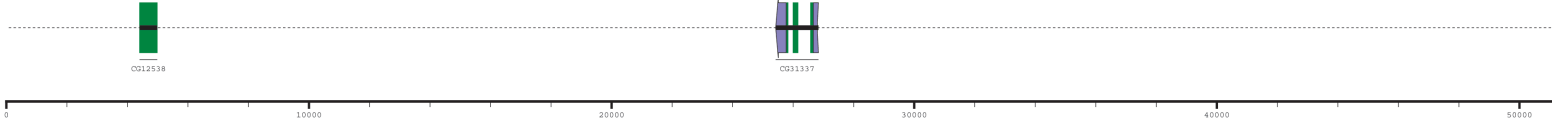

Dvir112

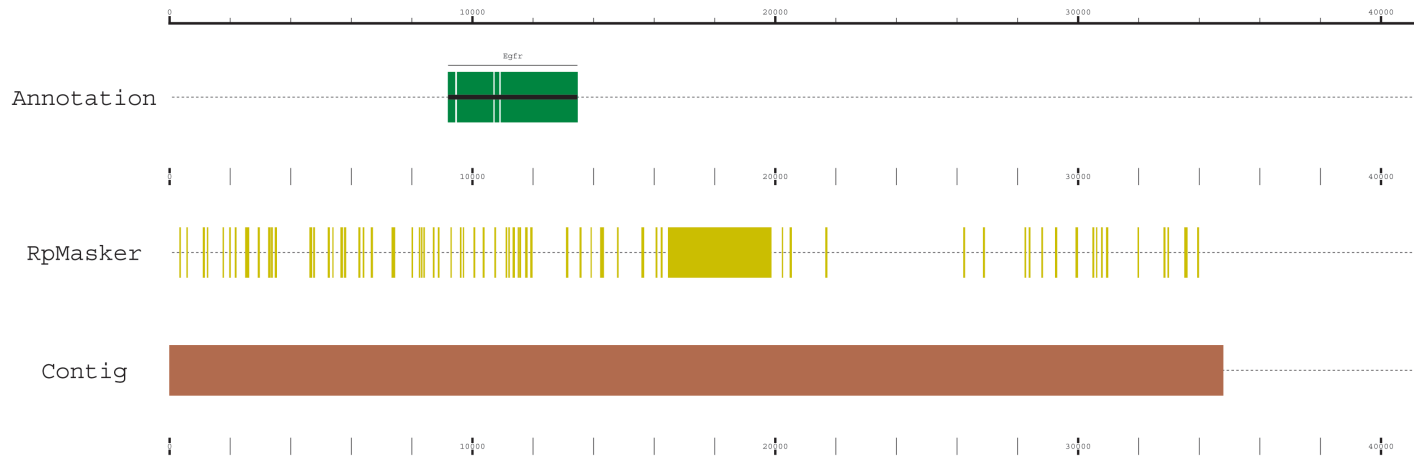

Annotation

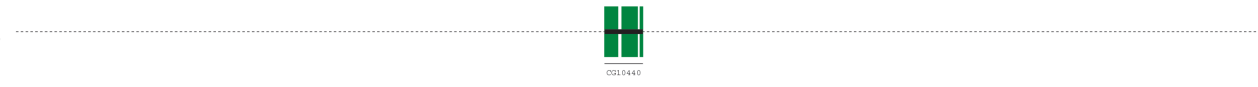

Dme112

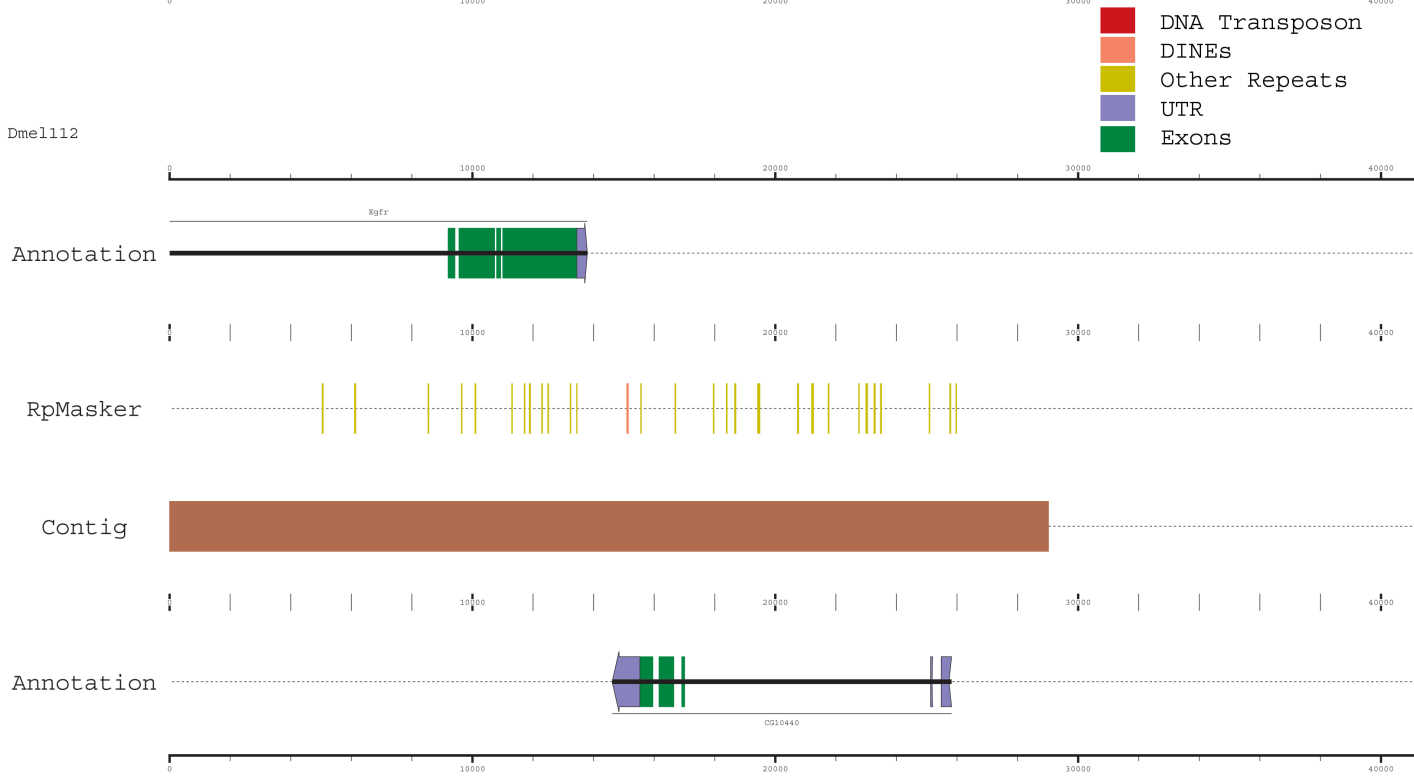

Annotation

Rpmasker

Contig

Annotation

- DNA Transposon
- DINEs
- Other Repeats
- UTR
- Exons

CG10440

Dvir121

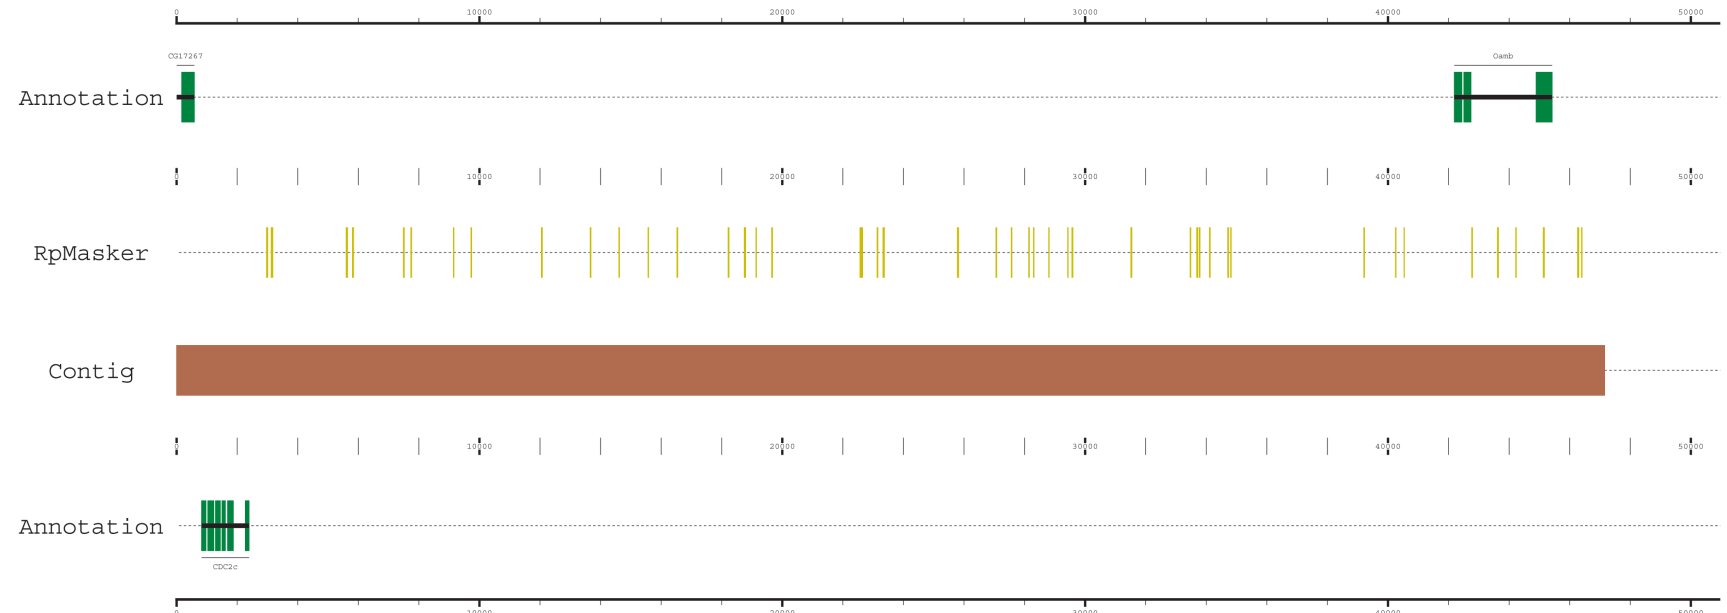

- DNA Transposon
- DINEs
- Other Repeats
- UTR
- Exons

Dmel121

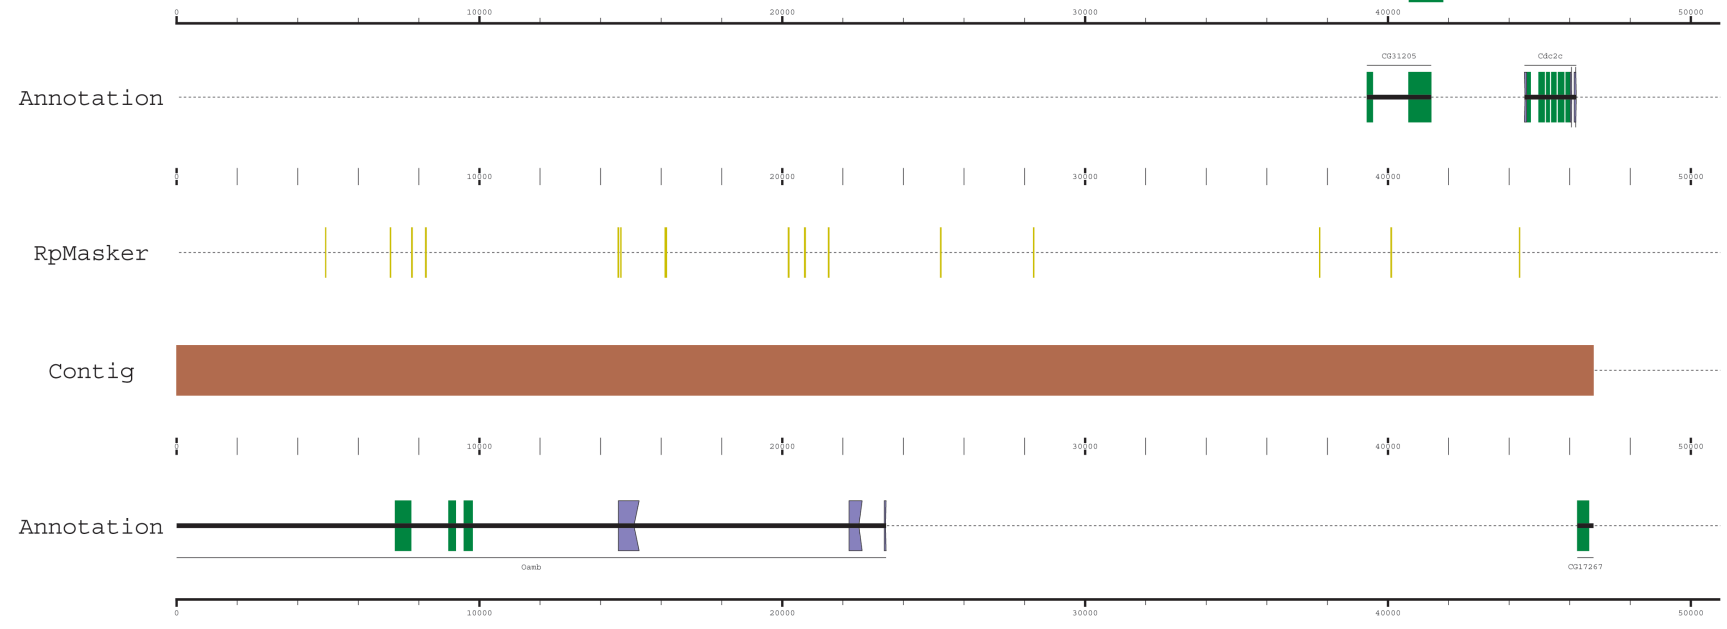

Dvir122

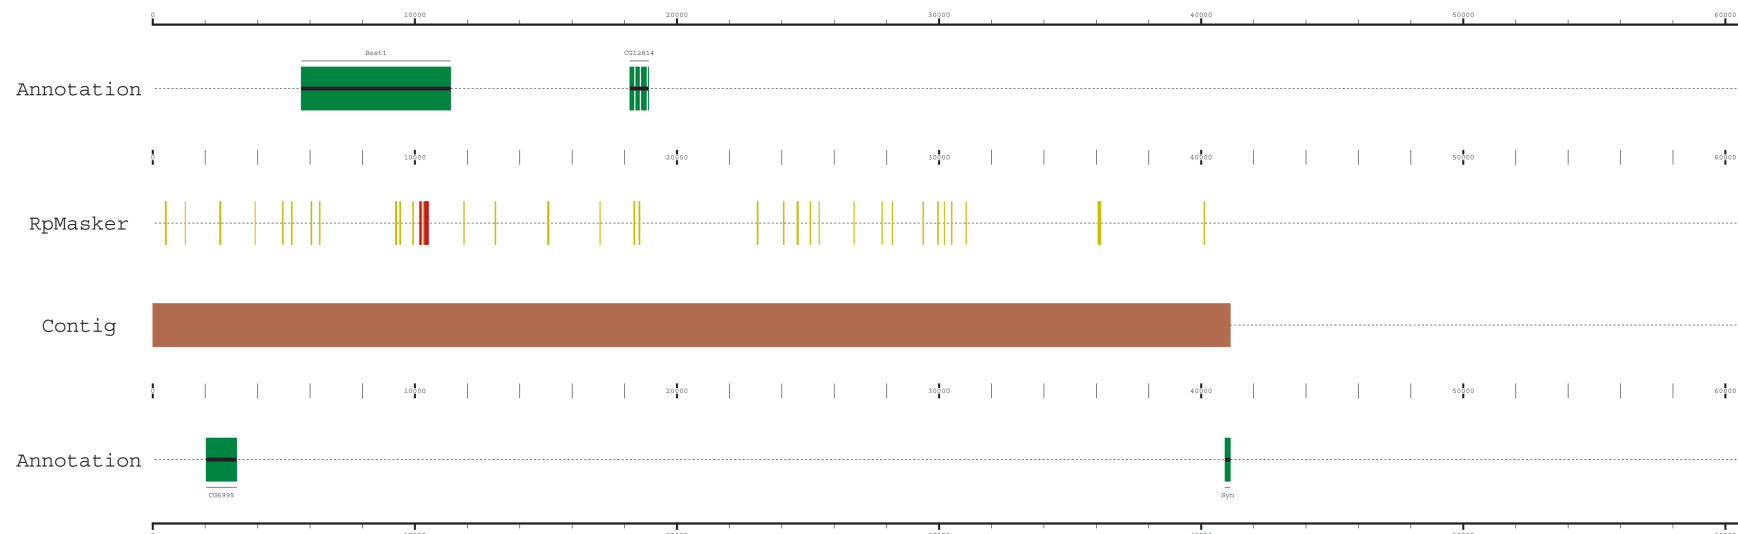

- DNA Transposon
- DINES
- Other Repeats
- UTR
- Exons

Dmell122

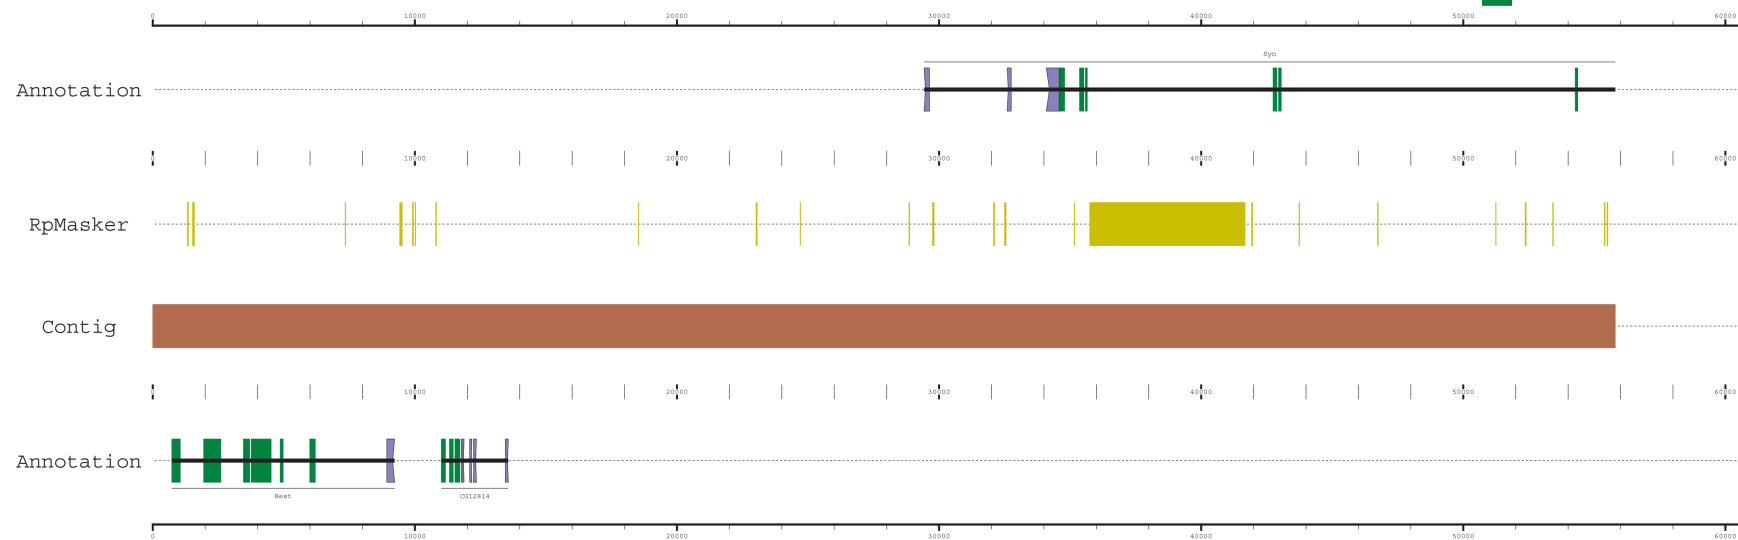

Dvir11

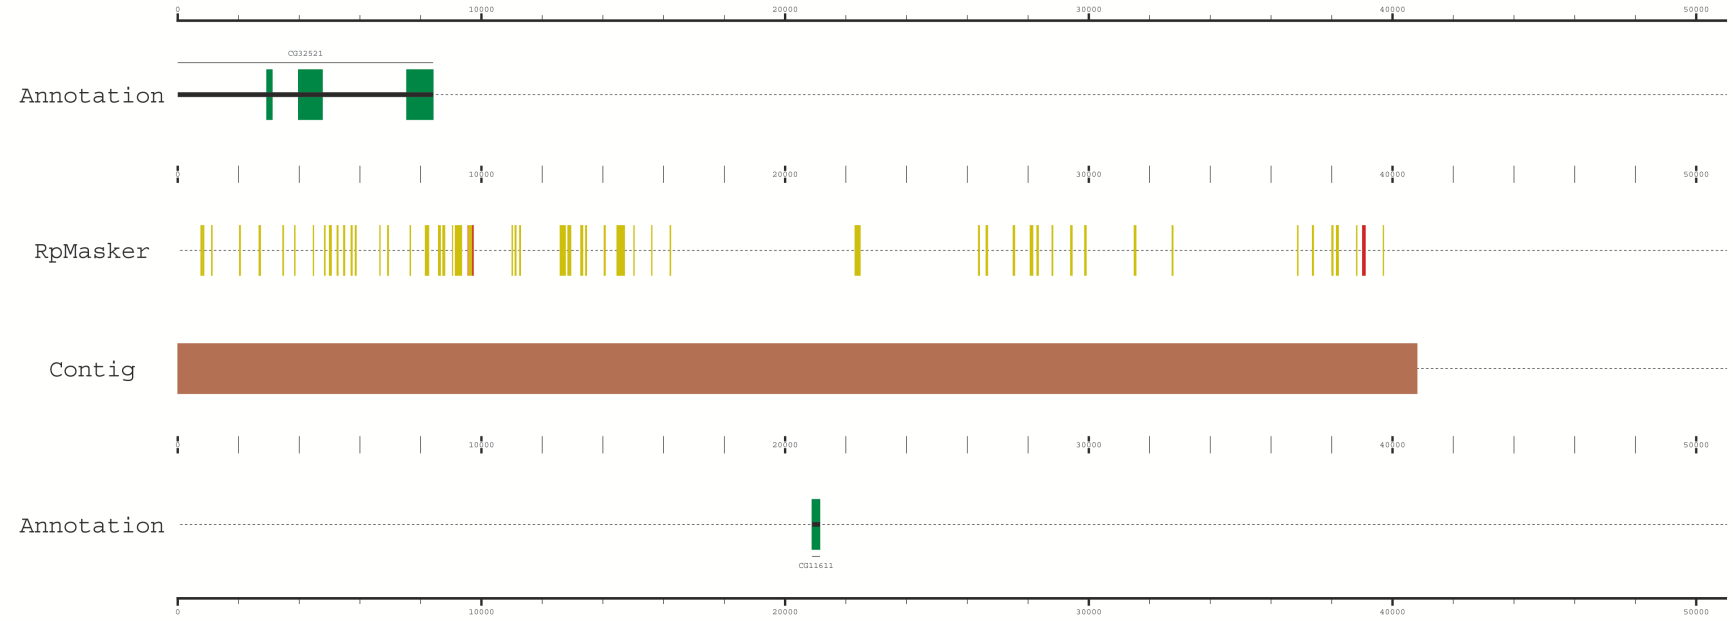

- DNA Transposon
- DINES
- Other Repeats
- UTR
- Exons

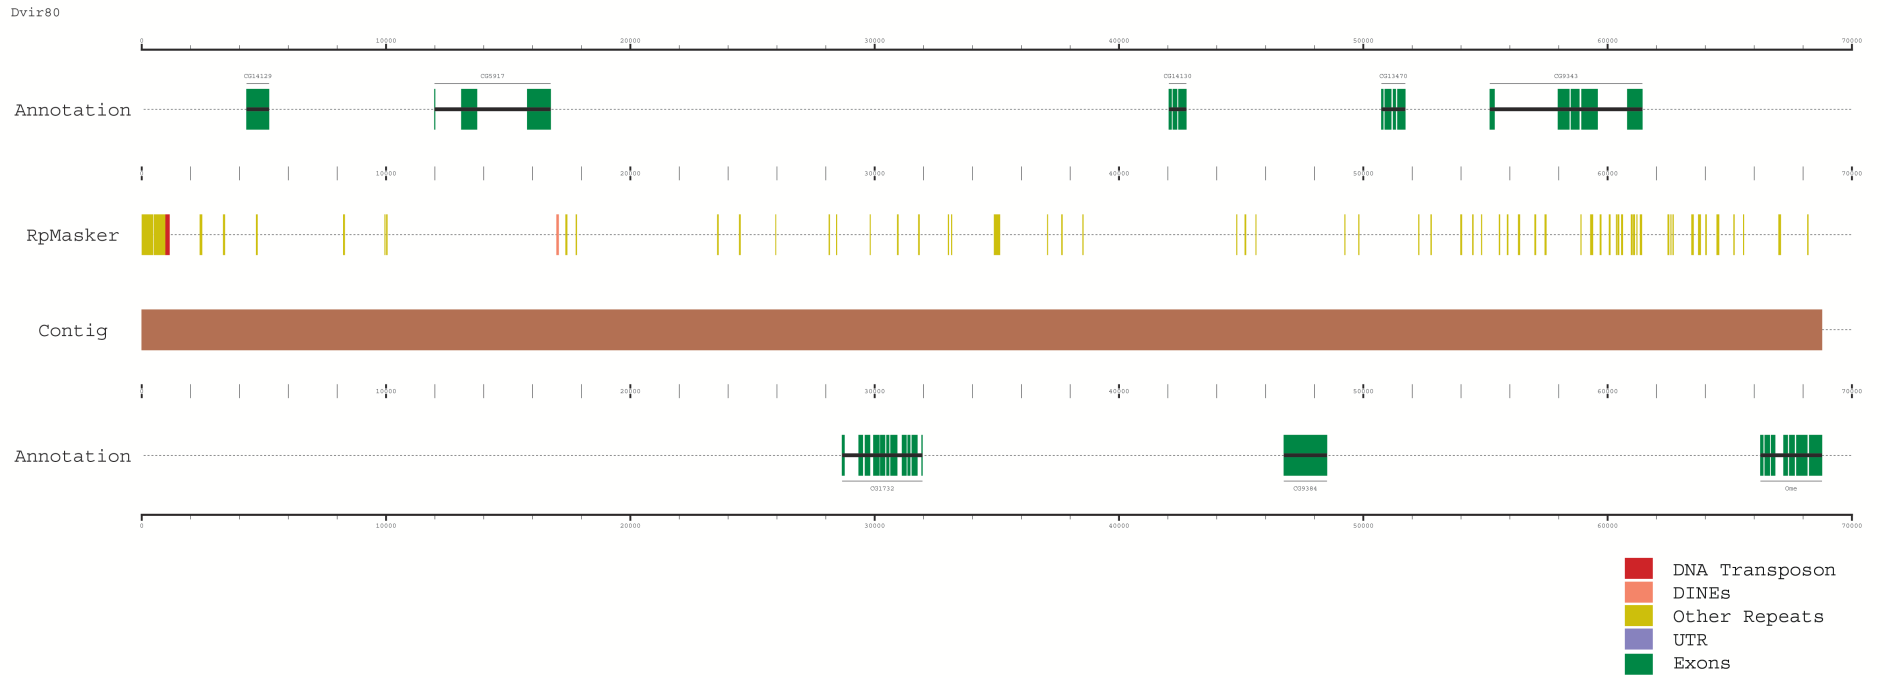

Supplement: gb-2006-7-2-r15-S2.pdf [file gb-2006-7-2-r15-S2.pdf]
