# Supplementary material for: Comparison of dot chromosome sequences from D. melanogaster and D. virilis reveals an enrichment of DNA transposon sequences in heterochromatic domains
Source: PubMed Central journal article supplement (PMC1431729; doi:10.1186/gb-2006-7-2-r15), 2006-02-20
Supplement: gb-2006-7-2-r15-S1.pdf [file gb-2006-7-2-r15-S1.pdf]

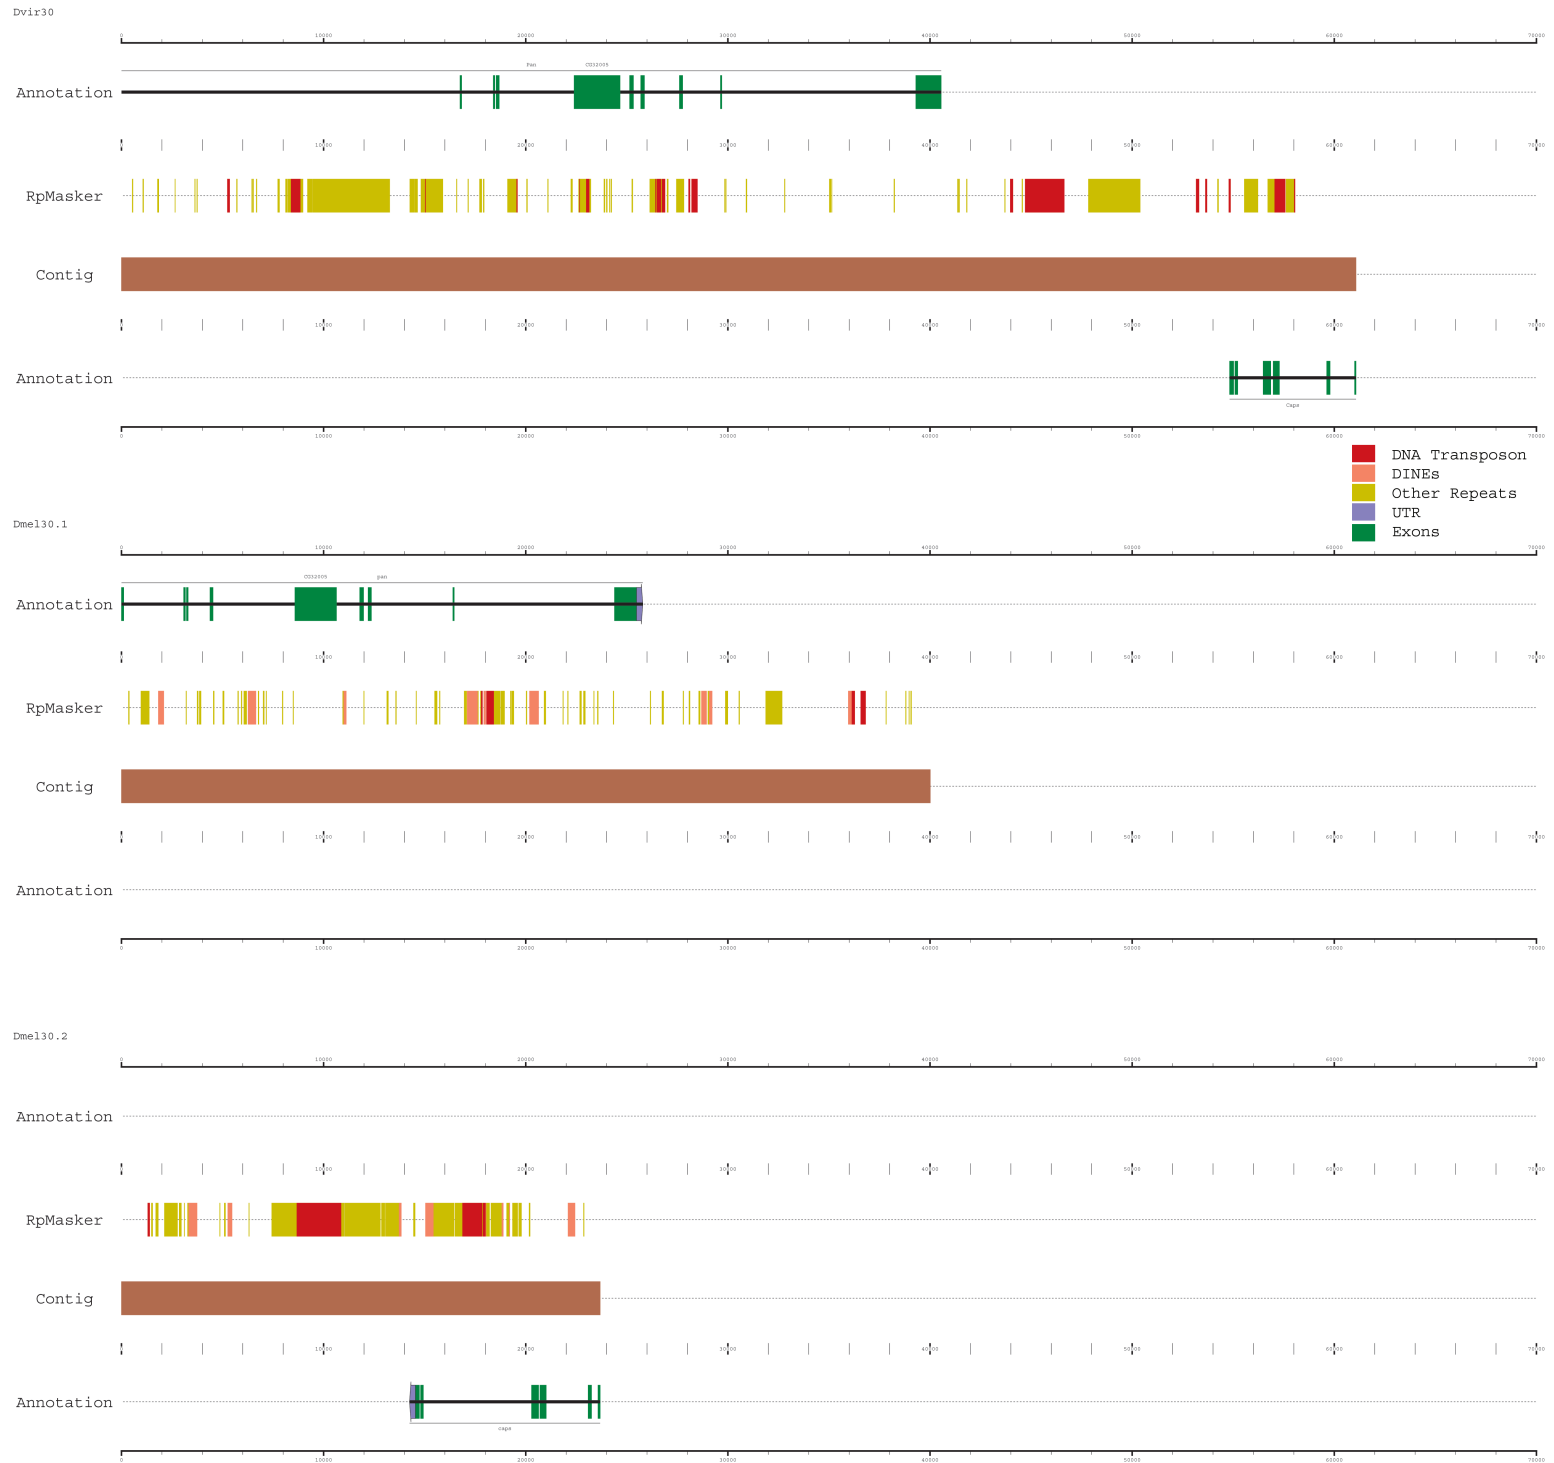

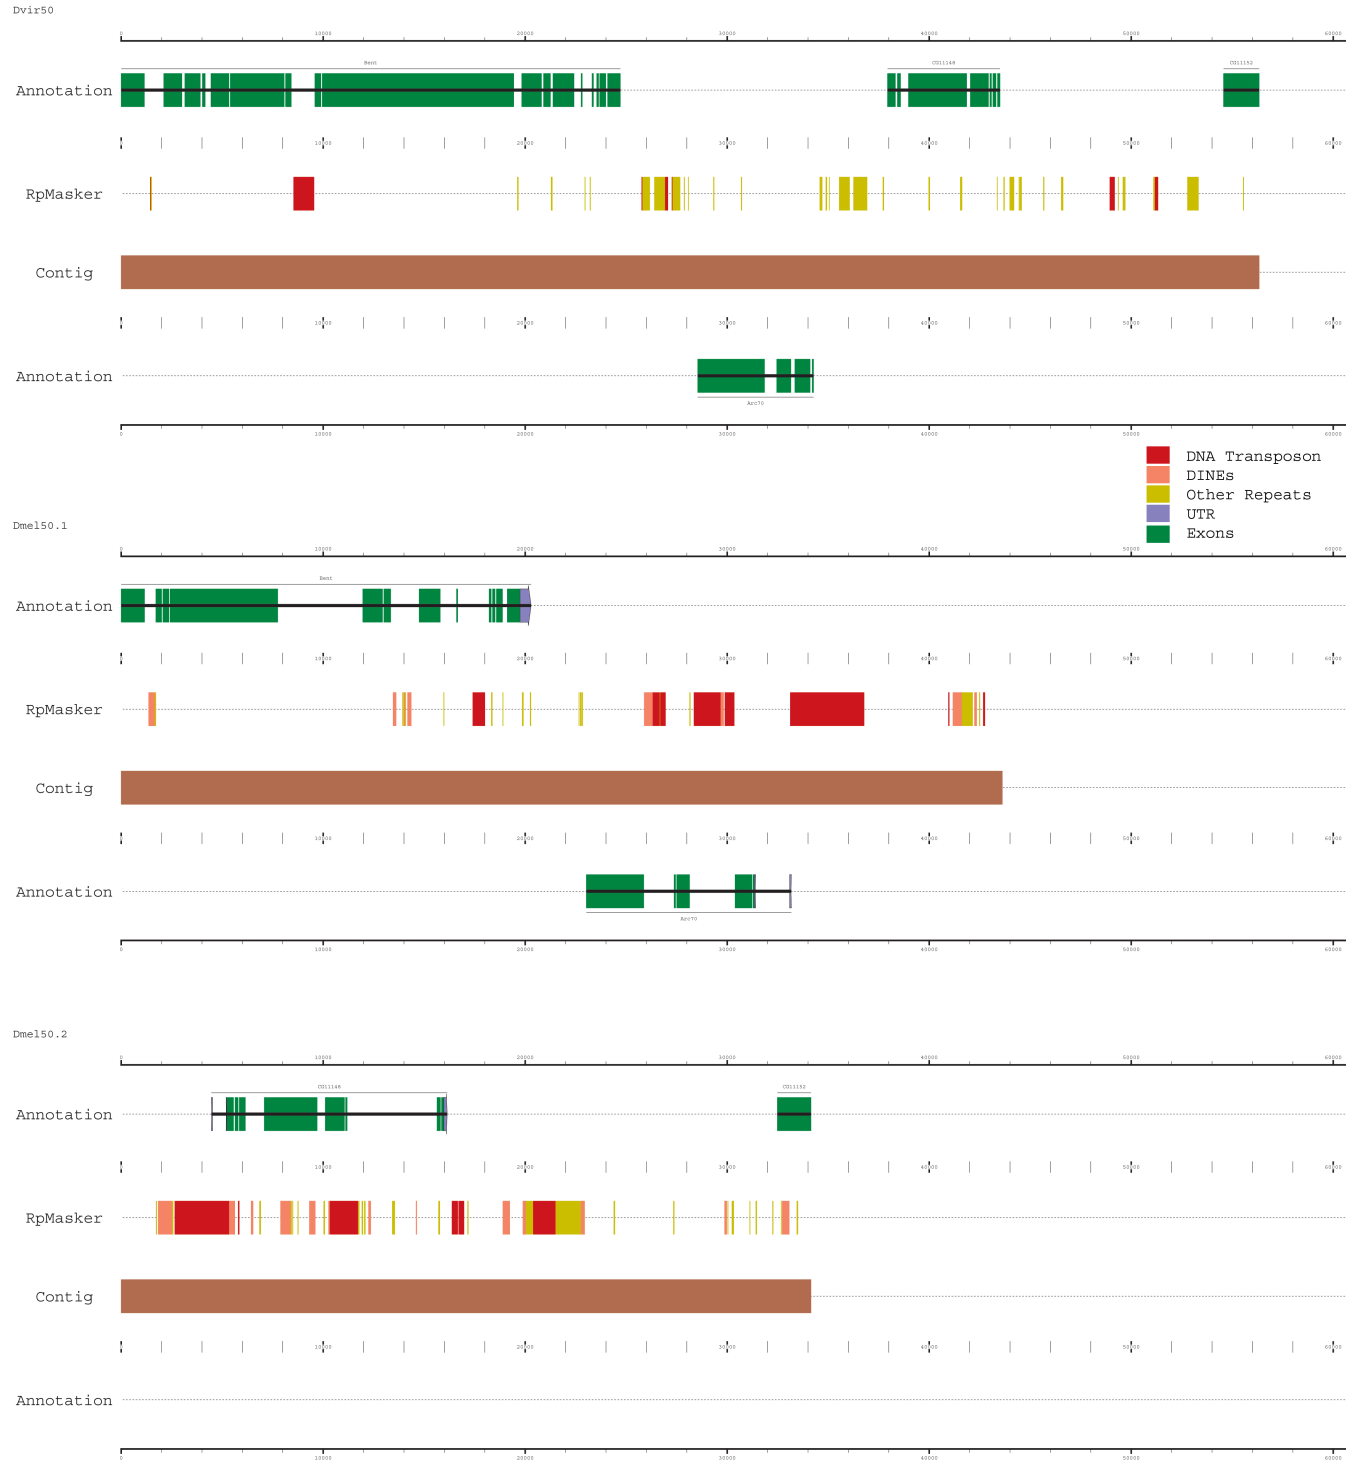

Dvir103

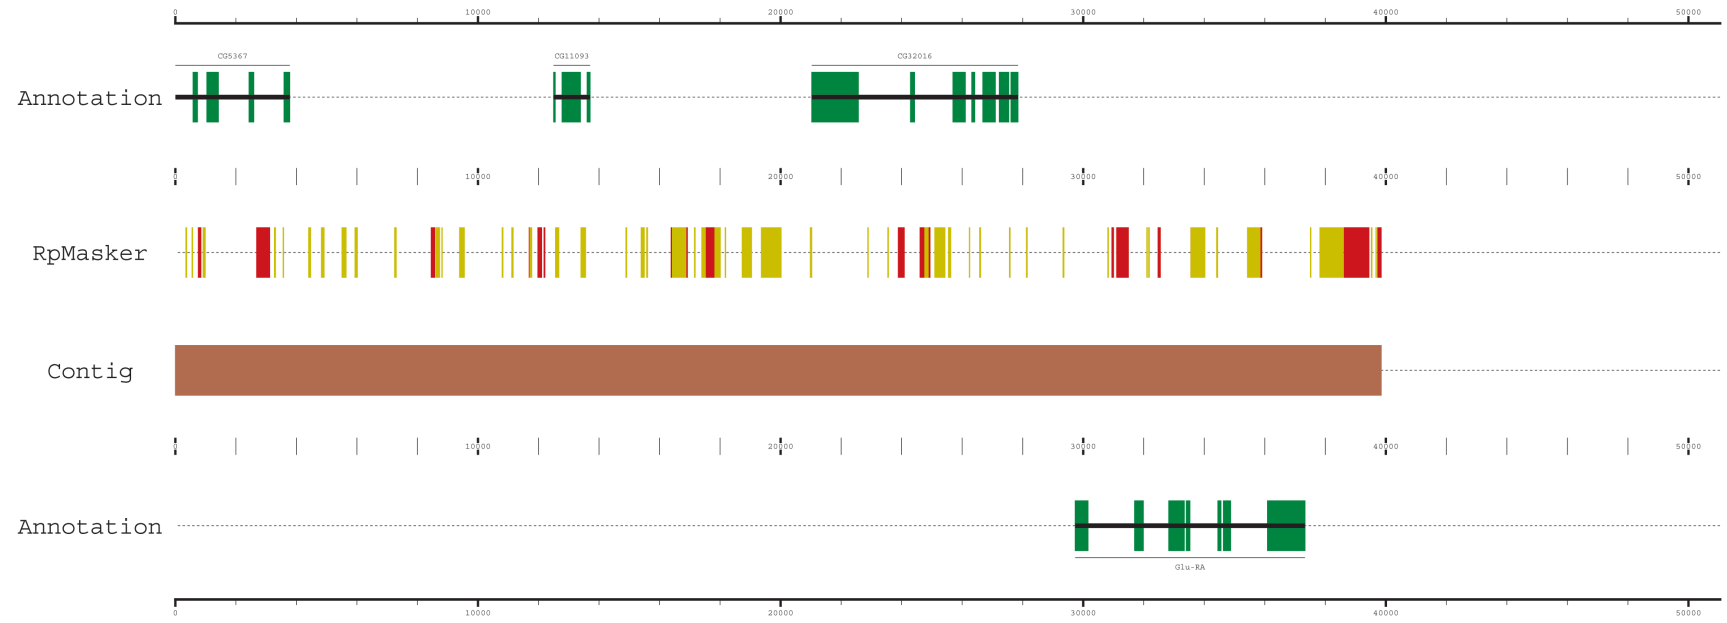

- DNA Transposon
- DINEs
- Other Repeats
- UTR
- Exons

Dmel103

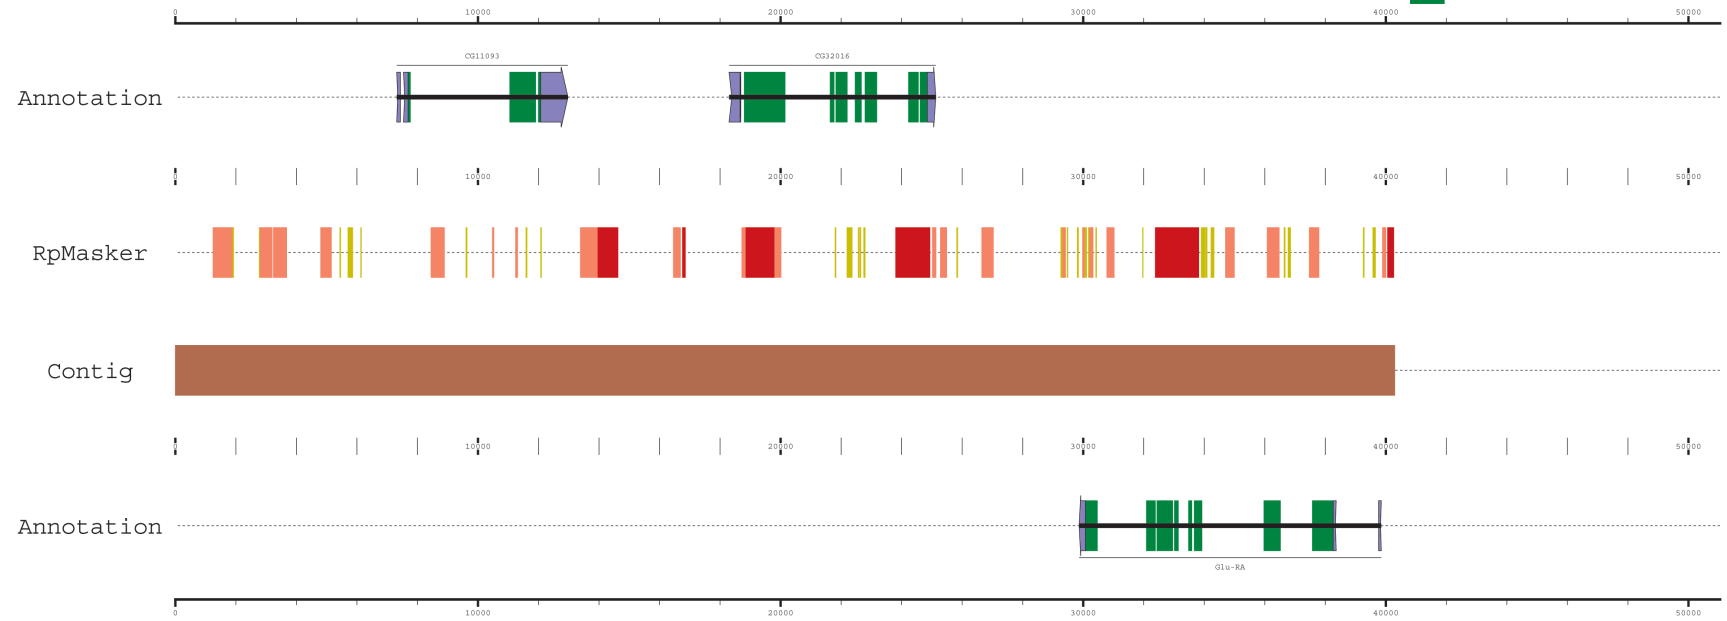

Dvir106

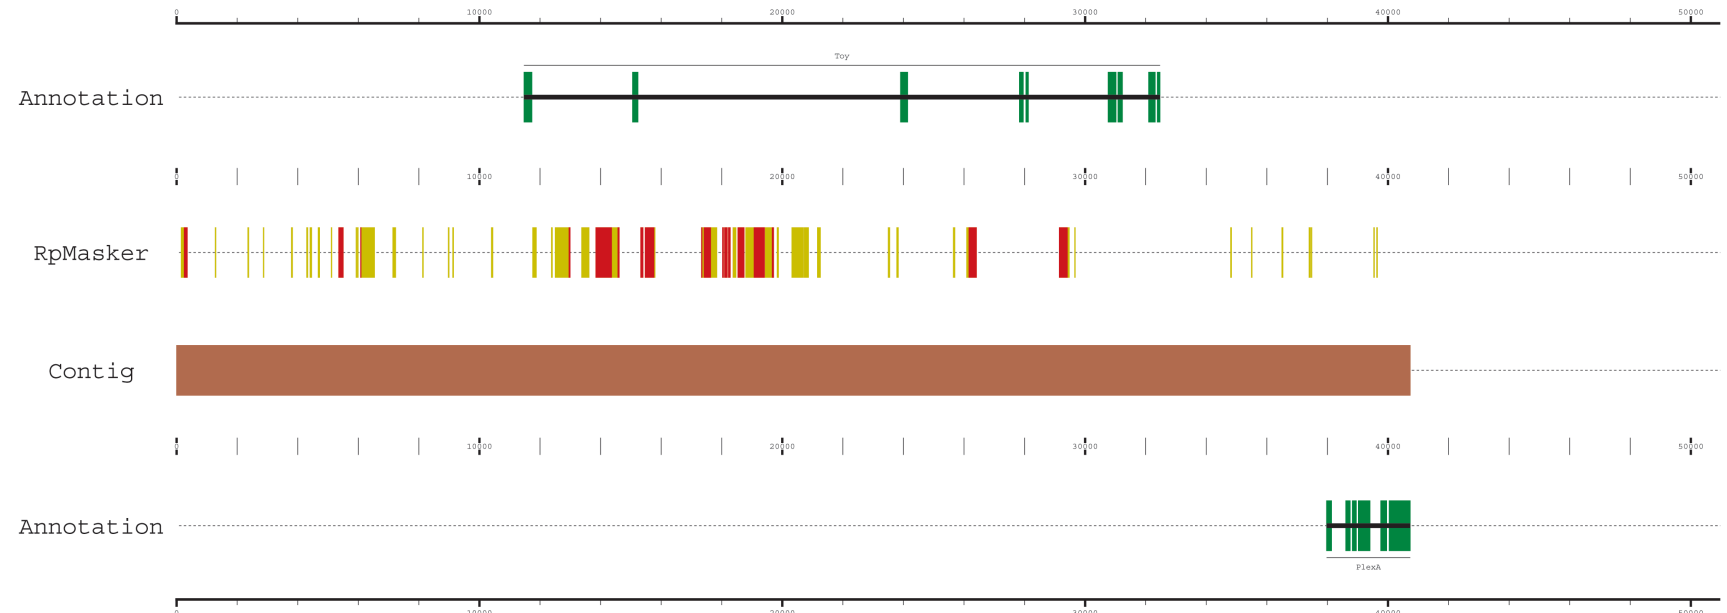

Dmel106

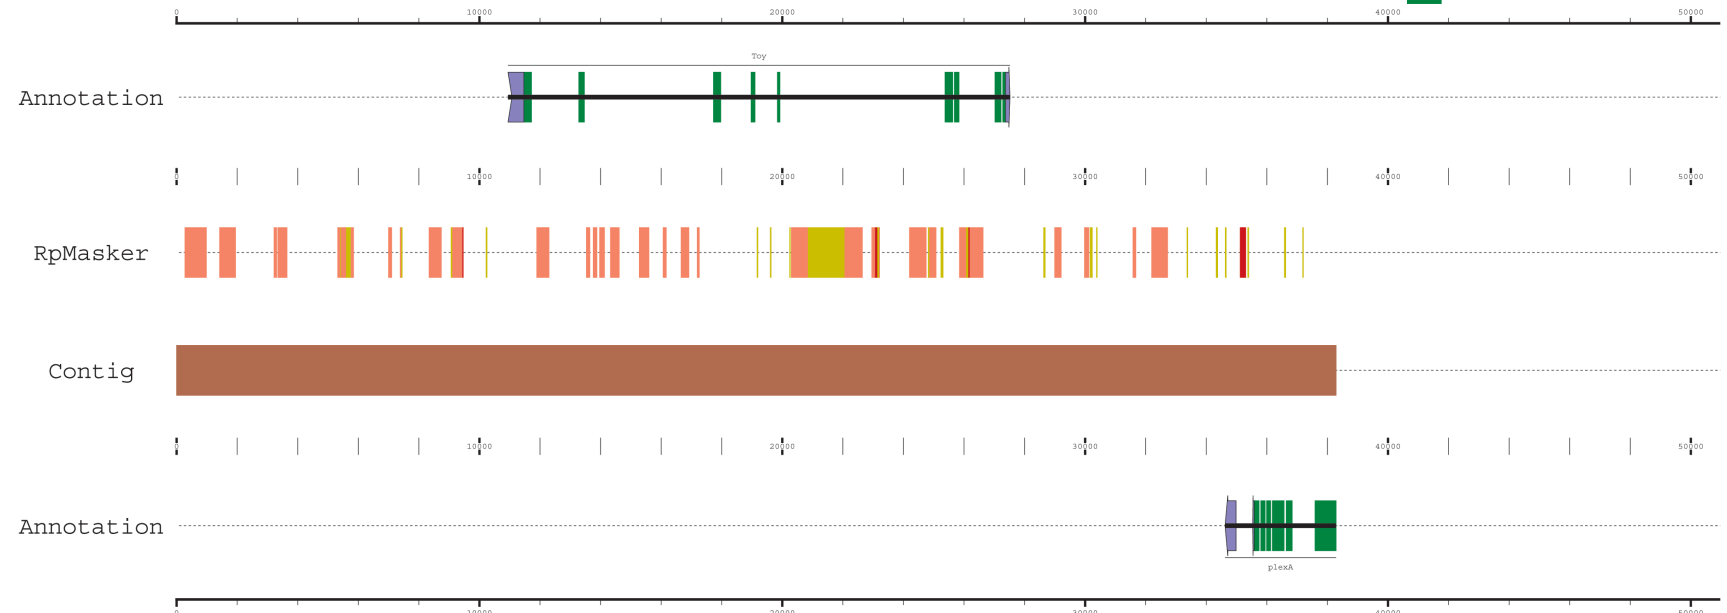

- DNA Transposon
- DINEs
- Other Repeats
- UTR
- Exons

Dvir67

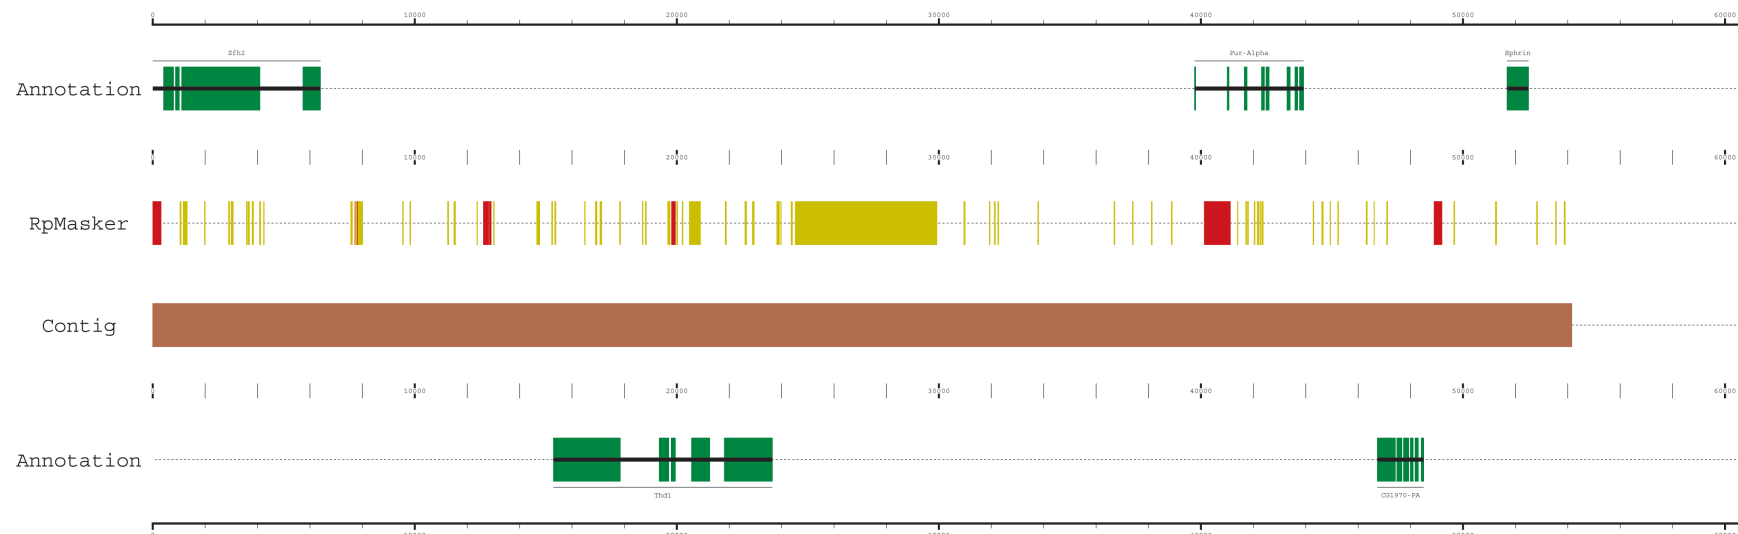

- DNA Transposon
- DINEs
- Other Repeats
- UTR
- Exons

Dmel67

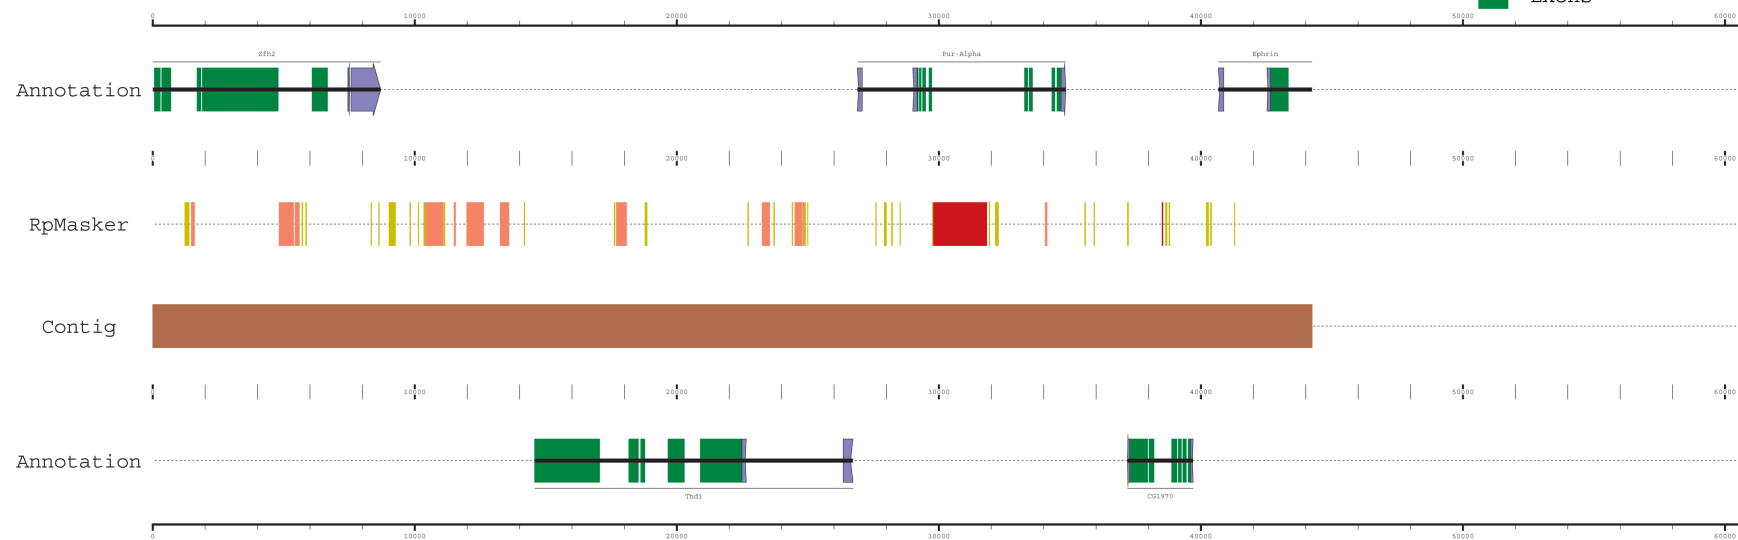

Dvir113

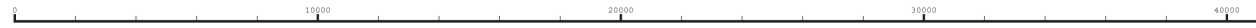

Annotation

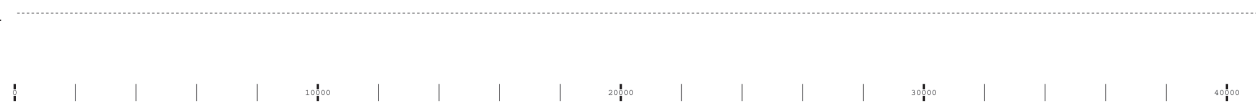

RpMasker

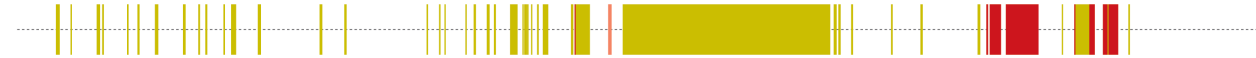

Contig

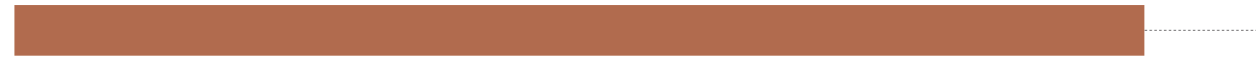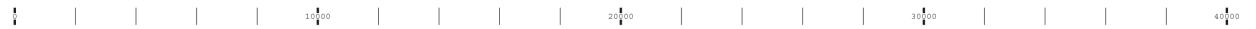

Annotation

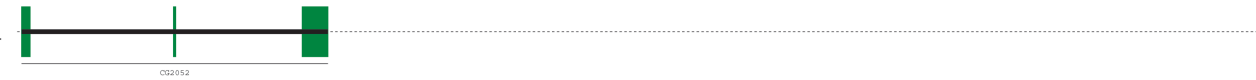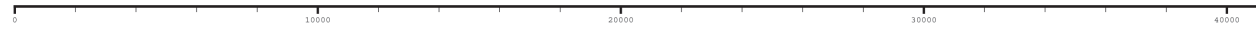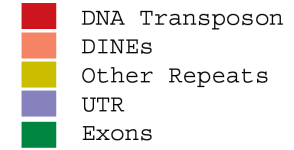

Dmell113

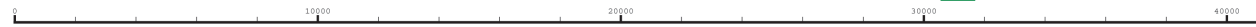

Annotation

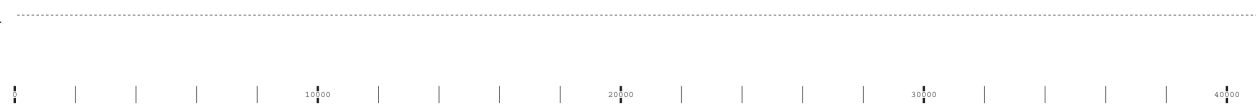

RpMasker

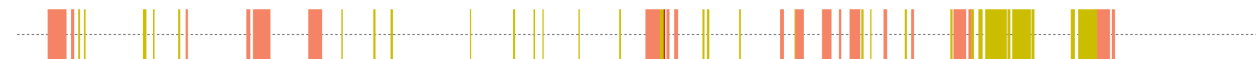

Contig

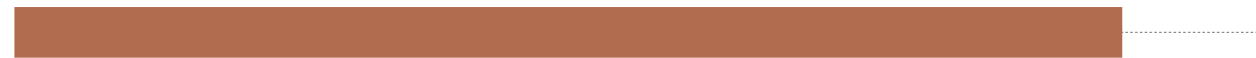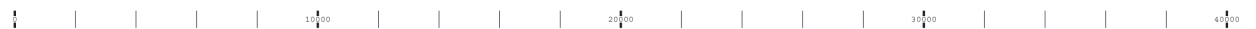

Annotation

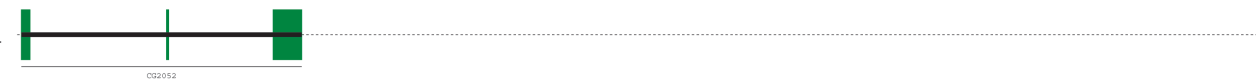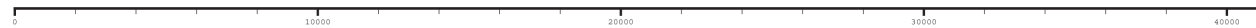

Dvir72

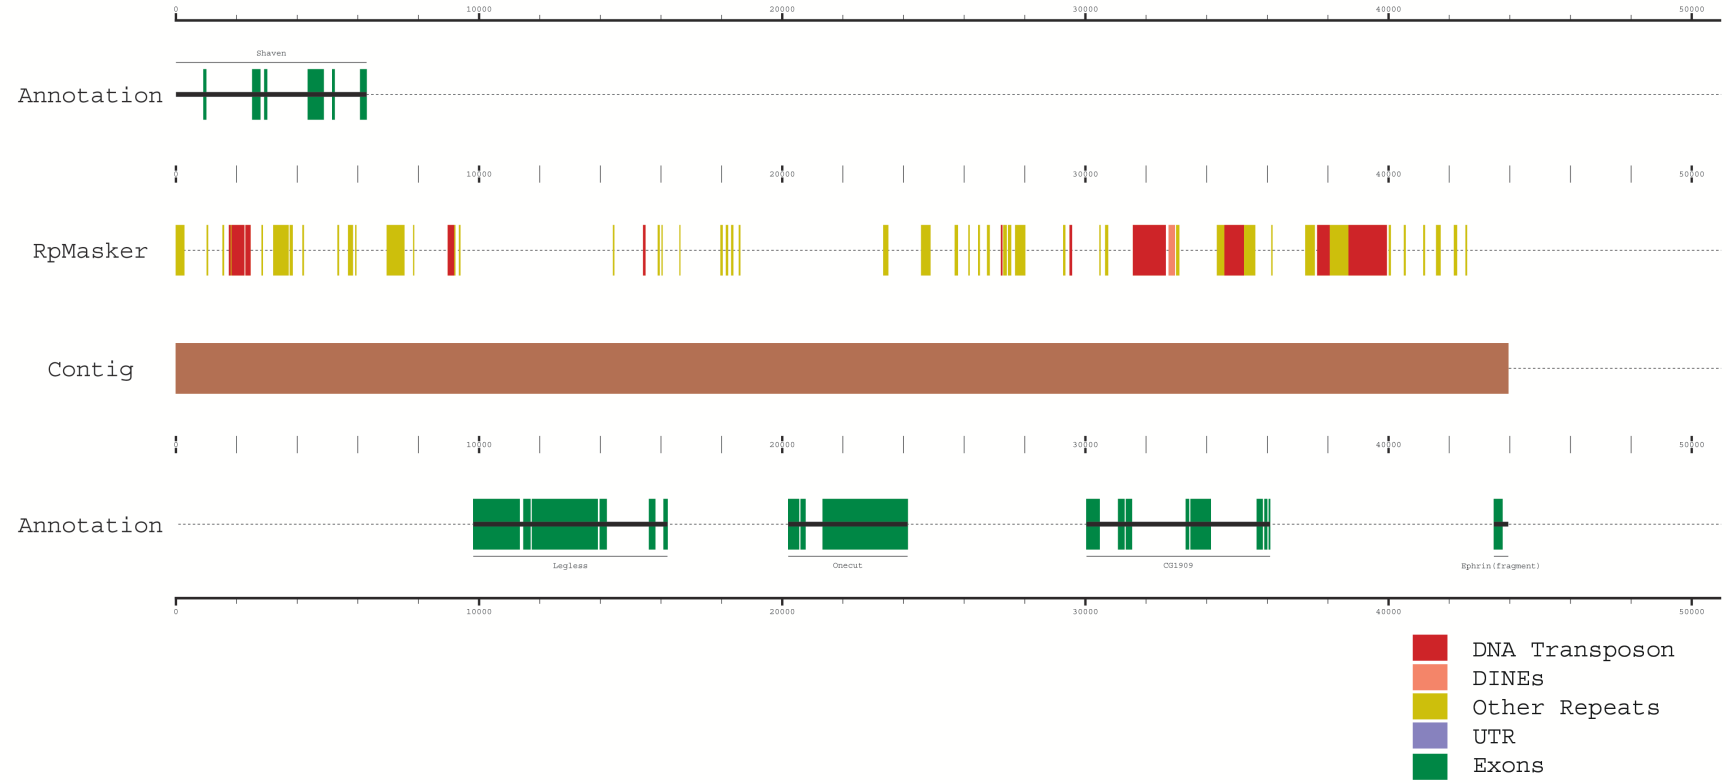

Dvir91

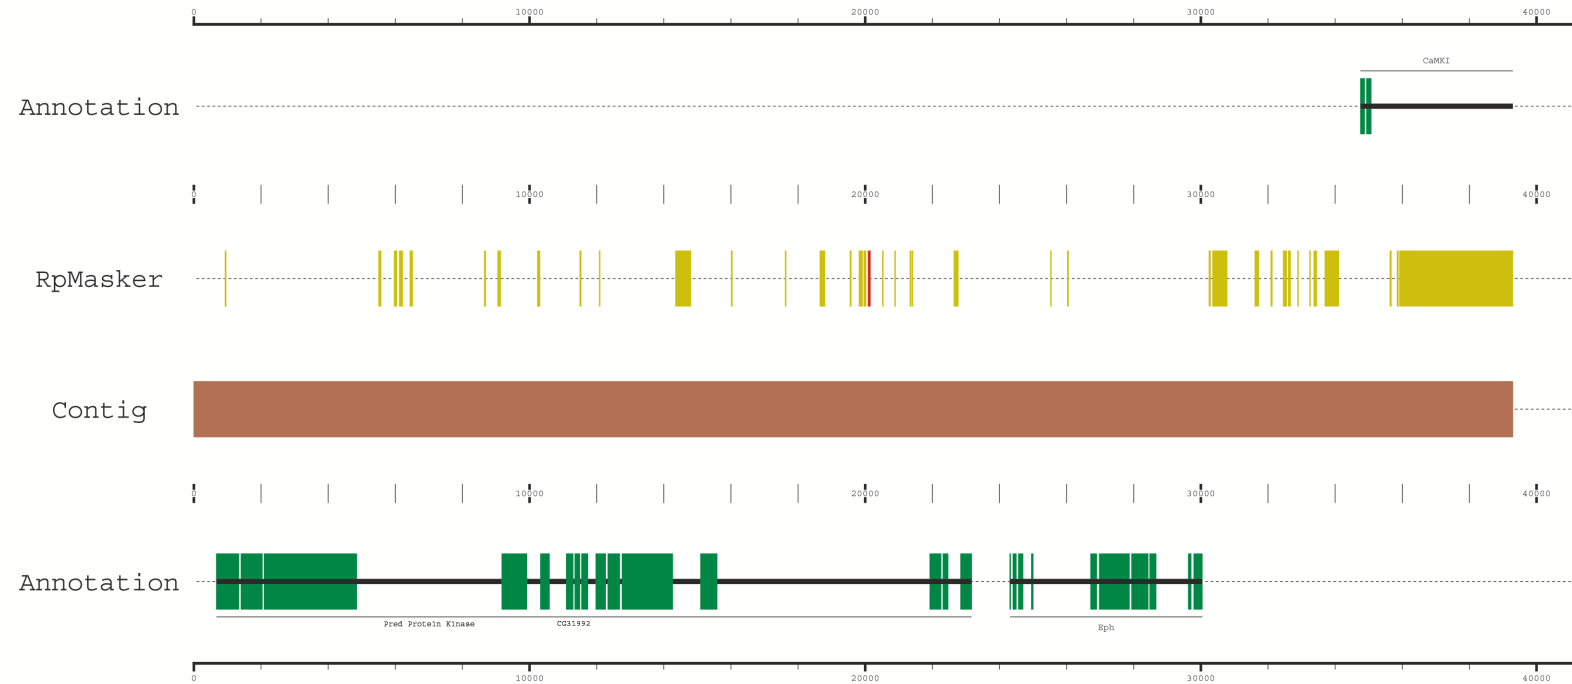

- DNA Transposon
- DINEs
- Other Repeats
- UTR
- Exons
